# Supplementary material
Source: PubMed Central journal article supplement (PMC7914218)
Supplement: NIHMS1668035-supplement-1.pdf [file NIHMS1668035-supplement-1.pdf]

**Table S1. The top 15 up-regulated genes after acute FGF23 administration**

| Gene Name                                    | Symbol  | NCBI No.  | Fold Change | P-value  |
|----------------------------------------------|---------|-----------|-------------|----------|
| Early growth response 1                      | Egr1    | NM_007913 | 9.06671     | 1.36E-08 |
| Heparin-binding EGF-like growth factor       | Hbegf   | NM_010415 | 3.09658     | 5.33E-05 |
| Dual specificity phosphatase 6               | Dusp6   | NM_026268 | 2.41652     | 1.65E-08 |
| Zinc finger protein 36                       | Zfp36   | NM_011756 | 2.22423     | 0.00017  |
| Immediate early response 2                   | Ier2    | NM_010499 | 1.96741     | 8.97E-06 |
| Dual specificity phosphatase 4               | Dusp4   | NM_176933 | 1.87764     | 0.000835 |
| Basic helix-loop-helix domain, class B2      | Bhlhb2  | NM_011498 | 1.79652     | 0.000678 |
| Ngfi-A binding protein                       | Nab2    | NM_008668 | 1.69864     | 0.000396 |
| Jun-B oncogene                               | Junb    | NM_008416 | 1.65532     | 0.000384 |
| SERTA domain containing 1                    | Sertad1 | NM_018820 | 1.50534     | 6.02E-05 |
| Choline kinase alpha                         | Chka    | NM_013490 | 1.50023     | 0.000239 |
| DnaJ (Hsp40) homolog, subfamily C, member 17 | Dnajc17 | NM_139139 | 1.48847     | 0.000155 |
| DNA-damage inducible transcript 3            | Ddit3   | NM_007837 | 1.48731     | 0.000251 |
| Sprouty homolog 2                            | Spry2   | NM_011897 | 1.47345     | 0.000733 |
| FBJ osteosarcoma oncogene                    | Fos     | NM_010234 | 1.4645      | 0.000658 |

**Table S2. The 15 most down-regulated genes after acute FGF23 administration**

| <b>Gene Name</b>                                                   | <b>Symbol</b> | <b>NCBI No.</b> | <b>Fold Change</b> | <b>P-value</b> |
|--------------------------------------------------------------------|---------------|-----------------|--------------------|----------------|
| Acyl-CoA thioesterase 3                                            | Acot3         | NM_134246       | -1.44409           | 0.000438       |
| Solute carrier organic anion transporter family member 1a4         | Slco1a4       | NM_030687       | -1.43617           | 0.000374       |
| Solute carrier family 35                                           | Slc35a3       | NM_144902       | -1.35772           | 0.000985       |
| Leucine-rich repeats and immunoglobulin-like domains 2             | Lrig2         | NM_001025067    | -1.33814           | 0.000991       |
| APOBEC1 complementation factor                                     | A1cf          | NM_001081074    | -1.33433           | 0.000139       |
| Tetratricopeptide repeat domain 30A2                               | Ttc30a2       | NM_001081228    | -1.31536           | 0.000198       |
| Tryptophan rich basic protein                                      | Wrb           | NM_207301       | -1.29465           | 2.62E-05       |
| ATPase, H <sup>+</sup> transporting, lysosomal accessory protein 2 | Atp6ap2       | NM_027439       | -1.28521           | 0.000426       |
| Solute carrier family 31, member 1                                 | Slc31a1       | NM_175090       | -1.27627           | 0.000518       |
| Calcium-dependent activator protein for secretion 2                | Cadps2        | NM_153163       | -1.2553            | 0.000982       |
| Carbonic anhydrase 13                                              | Car13         | NM_024495       | -1.24159           | 0.000629       |
| Plasma glutamate carboxypeptidase                                  | Pgcp          | NM_018755       | -1.22196           | 0.000821       |
| Adenosine deaminase-like                                           | Adal          | NM_029475       | -1.20276           | 0.000991       |
| Galactose mutarotase                                               | Galm          | NM_176963       | -1.19341           | 0.000266       |
| Germ cell-less homolog 1                                           | Gmcl1         | NM_027955       | -1.17749           | 0.000901       |

Figure S1

A. Npt2a (PT S1/S2 marker)

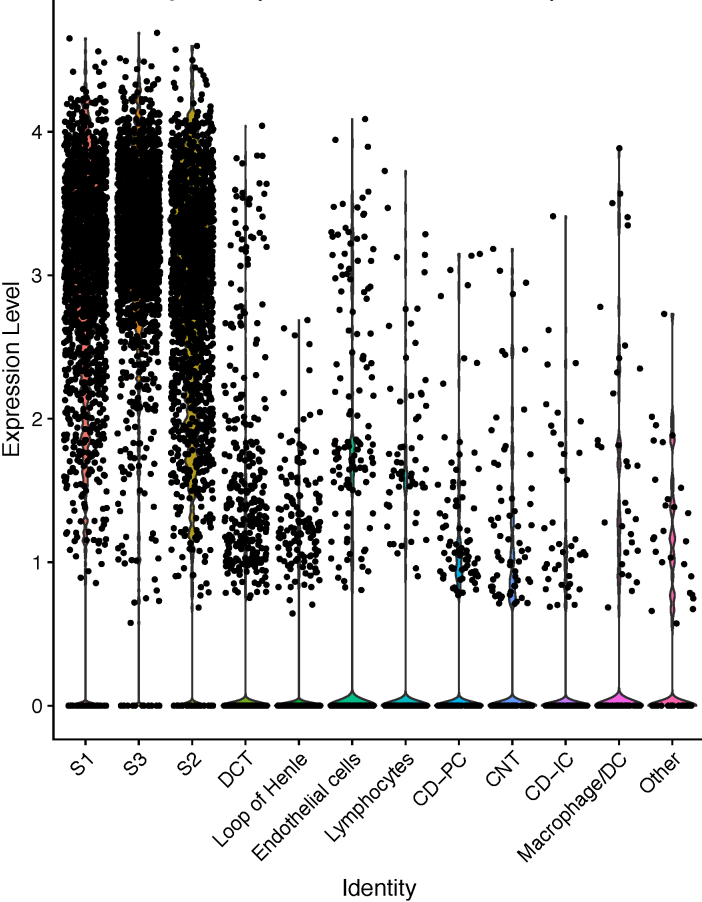

B. Ncc (CNT/DT marker)

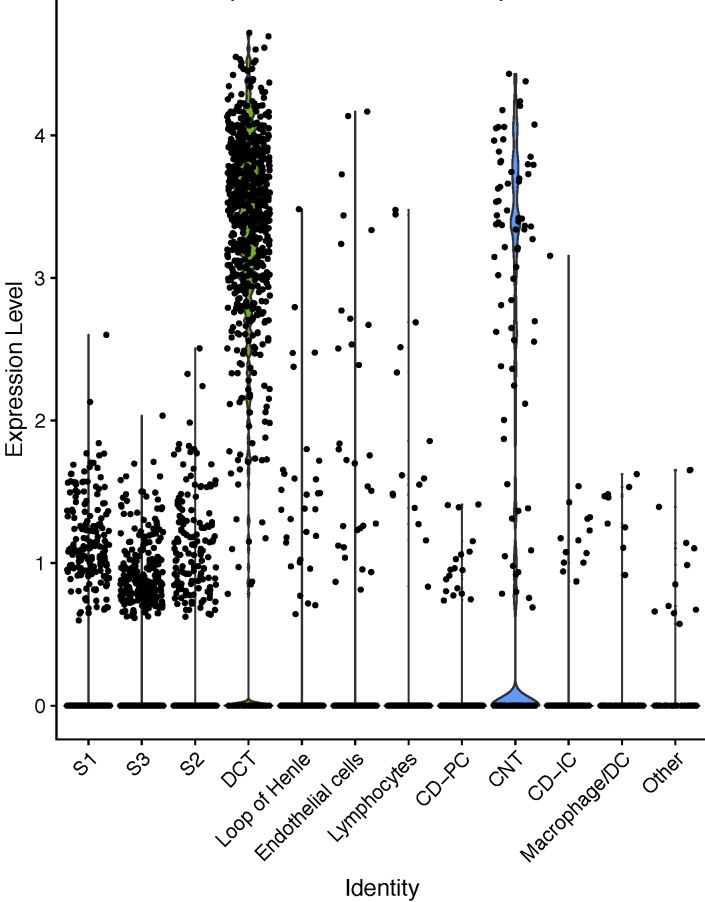

- S1
- S3
- S2
- DCT
- Loop of Henle
- Endothelial cells
- Lymphocytes
- CD-PC
- CNT
- CD-IC
- Macrophage/DC
- Other

Figure S2

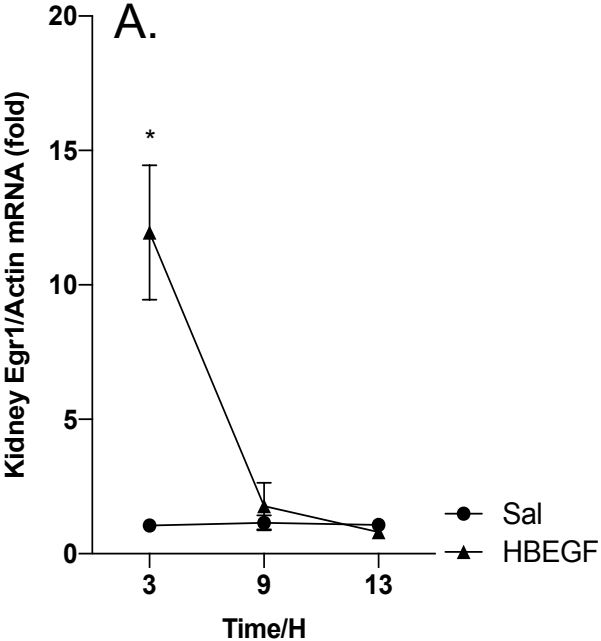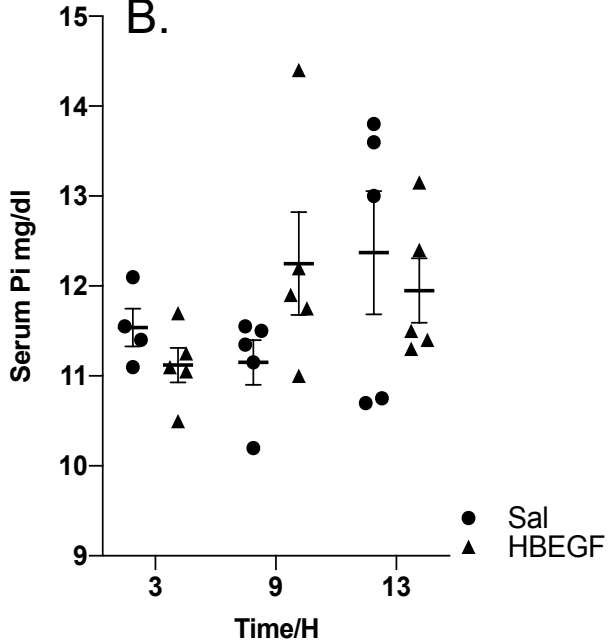

Figure S3

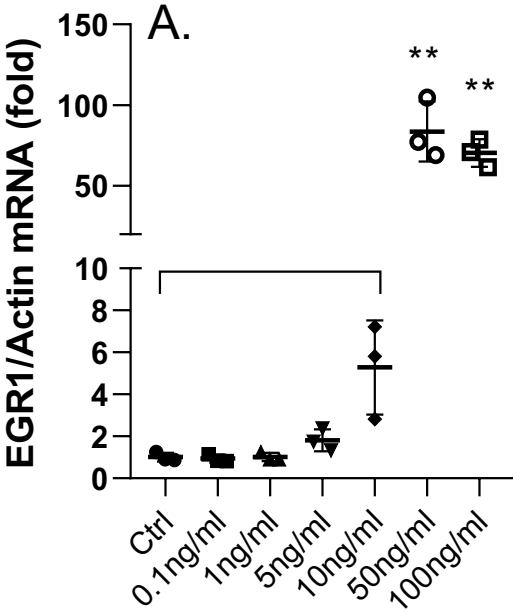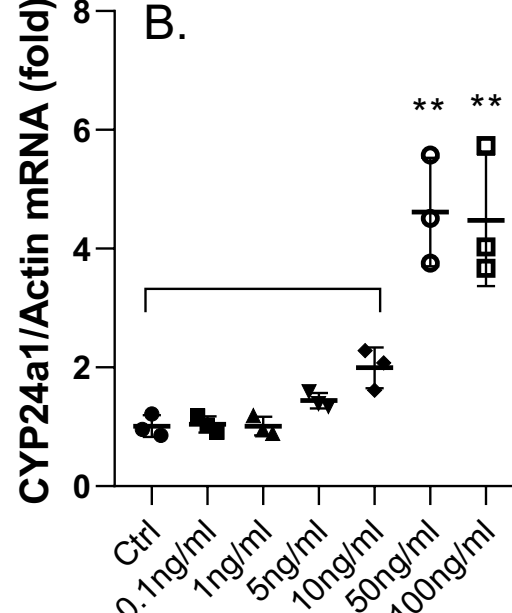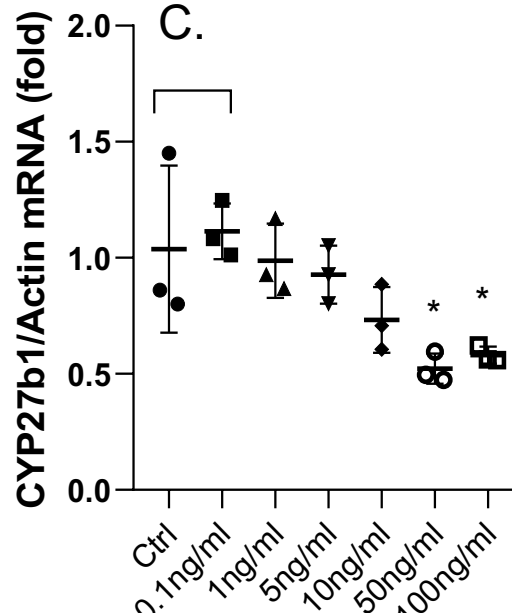

**Table S1 and Table S2. Kidney microarray data after acute FGF23 administration.** By microarray, 1 hour post FGF23 injection to WT mice showed significant changes in kidney mRNAs compared with control mice. The top 15 up-regulated genes are listed in Table 1 with *Egr1* serving as the positive control for FGF23 signaling through MAPK. *Hbegf* was the second-most highly elevated gene. Table 2 lists the 15 most down-regulated genes.

**Figure S1. Violin plots of nephron segment gene markers.** Violin plots of (A) *Npt2a* (primarily proximal tubule) and (B) *Ncc* (primarily distal tubule) are shown.

**Figure S2. Long term effect of HBEGF on WT renal genes.** 5 ug rhHBEGF was given intravenously to 9-10 week old female WT mice. (A) *Egr1* mRNA expression was induced at 3 h and returned to baseline level at 9 h and 13 h. No significant changes were observed in serum phosphorus (B). (\* $P < 0.05$  versus saline control mice. N=4-5. 'Sal', saline).

**Figure S3. Incremental doses of HBEGF *in vitro*.** HEK293 cells were treated with saline (Ctrl), 0.1 ng/ml, 1 ng/ml, 5 ng/ml, 10 ng/ml, 50 ng/ml or 100 ng/ml of rhHBEGF for 24 h. (A) *EGR1* mRNA levels started increasing at 5 ng/ml and were significantly elevated at 50 ng/ml and 100 ng/ml; (B) *CYP24A1* showed a similar pattern; (C) *CYP27B1* was significantly decreased at 50 ng/ml and 100 ng/ml (\* $P < 0.05$ , \*\* $P < 0.01$  versus the bracketed groups. N=3).

Supplementary information is available at *Kidney International's* website.
